# Direct regulation of *knot* gene expression by Ultrabithorax and the evolution of cis-regulatory elements in *Drosophila*

Bradley M. Hersh and Sean B. Carroll

University of Wisconsin-Madison, Howard Hughes Medical Institute, 1525 Linden Drive, Madison, WI 53706, USA

\*Author for correspondence (e-mail: sbcarroll@wisc.edu)

Accepted 2 February 2005

Development 132, 1567-1577

Published by The Company of Biologists 2005

doi:10.1242/dev.01737

## Summary

The regulation of development by Hox proteins is important in the evolution of animal morphology, but how the regulatory sequences of Hox-regulated target genes function and evolve is unclear. To understand the regulatory organization and evolution of a Hox target gene, we have identified a wing-specific cis-regulatory element controlling the *knot* gene, which is expressed in the developing *Drosophila* wing but not the haltere. This regulatory element contains a single binding site that is crucial for activation by the transcription factor Cubitus interruptus (Ci), and a cluster of binding sites for repression by the Hox protein Ultrabithorax (UBX). The negative and positive control regions are physically separable, demonstrating that UBX does not repress by competing for occupancy of Ci-binding sites. Although *knot* expression is conserved among *Drosophila* species, this cluster of UBX binding sites is not. We isolated the *knot* wing cis-regulatory element from *D. pseudoobscura*, which

contains a cluster of UBX-binding sites that is not homologous to the functionally defined *D. melanogaster* cluster. It is, however, homologous to a second *D. melanogaster* region containing a cluster of UBX sites that can also function as a repressor element. Thus, the *knot* regulatory region in *D. melanogaster* has two apparently functionally redundant blocks of sequences for repression by UBX, both of which are widely separated from activator sequences. This redundancy suggests that the complete evolutionary unit of regulatory control is larger than the minimal experimentally defined control element. The span of regulatory sequences upon which selection acts may, in general, be more expansive and less modular than functional studies of these elements have previously indicated.

Key words: Hox genes, Cis-regulatory element, Ultrabithorax, *Drosophila*, Evolution

## Introduction

The Hox proteins are important regulatory molecules that shape the patterning of the anteroposterior axis in animal development, and changes in Hox expression pattern during evolution are associated with morphological modifications (Gellon and McGinnis, 1998). Despite marked differences in appearance, fruit flies, fish, humans and all other bilaterally symmetrical animals employ Hox proteins in the elaboration of this major body axis. The Hox transcription factors regulate downstream genes that may themselves have broad effects on morphology, as well as genes involved in terminal differentiation (Brodu et al., 2002; Rozowski and Akam, 2002). Hox proteins can influence developmentally important processes such as apoptosis (Knosp et al., 2004; Lohmann et al., 2002), cell proliferation (Dolle et al., 1993; Salser and Kenyon, 1996) and cell fusion (Shemer and Podbilewicz, 2002). Despite these myriad effects, very few direct Hox-regulated target genes have been identified (Mann and Carroll, 2002). Furthermore, although individual Hox proteins are capable of either positively or negatively regulating target genes (Capovilla et al., 1994; Li and McGinnis, 1999; Vachon et al., 1992), it is not understood how these different activities are determined. To determine how different Hox-regulated target genes are controlled, how novel target genes are

incorporated into regulatory networks and how changes in regulatory networks result in alterations in morphology, it is necessary to identify direct Hox-regulated target genes and characterize the regulatory elements that control them.

Within insects, the Hox gene *Ultrabithorax* (*Ubx*) is important for proper specification of the third thoracic segment. In *Drosophila* lacking *Ultrabithorax* function, the third thoracic segment is transformed to a second thoracic segment fate, resulting in complete duplication of the wing and mesonotum. In butterflies, clonal loss of *Ubx* also results in transformation of hindwing scales to a forewing pattern (Weatherbee et al., 1999). Thus, orthologous UBX proteins specify differences between forewings and hindwings in these two morphologically distinct contexts. A simple model postulates that *Ubx* modifies hindwing morphology by regulating different sets of downstream target genes in these insect orders (Weatherbee et al., 1999).

Several genes that are differentially expressed in the forewing and the haltere in *Drosophila*, and therefore are genetically downstream of *Ubx*, have been identified (Weatherbee et al., 1998). However, direct regulation of only one gene, *spalt* (*sal*), has been demonstrated (Galant et al., 2002). Through identification of additional UBX-regulated targets and characterization of their regulatory elements, we may determine sequence features that are required for UBX

regulation, and better understand how regulation by Hox proteins is integrated into a morphogenetic program, together with regulation by signaling pathways, other selector proteins and tissue-specific transcription factors.

The *knot* gene is a candidate for direct UBX regulation in the haltere. Loss of *knot* function causes apposition of the L3 and L4 veins, and loss of the L3-L4 intervein region in the forewing (Mohler et al., 2000; Vervoort et al., 1999). *knot* is expressed at the anteroposterior compartment boundary in the developing wing, where it is activated by Cubitus interruptus (Ci) (Vervoort et al., 1999), the transcriptional effector of the Hedgehog signaling pathway. *knot* expression is absent from the haltere, and *knot* is repressed cell-autonomously in clones that overexpress UBX in the wing (Galant et al., 2002). In addition, *D-SRF* (*Drosophila* serum response factor; bs – FlyBase), which is itself a target of UBX repression (Weatherbee et al., 1998), requires *knot* for activation (Vervoort et al., 1999). Thus, lack of *D-SRF* expression in the haltere may be due either to direct action of UBX on *D-SRF* regulatory sequences or to UBX repression of *knot*, its activator.

The *knot* gene is also required during embryonic development for formation of embryonic muscle (Croizatier and Vincent, 1999) and several head structures (Croizatier et al., 1999; Seecoomar et al., 2000). *knot* is expressed in the lymph gland precursors, and is required for the development of lamellocytes, large cells that encapsulate foreign bodies, in response to parasitization (Croizatier et al., 2004). This multiplicity of functions suggests a multiplicity of regulatory elements that control *knot* expression in its various contexts.

We have identified a wing-specific regulatory element for the *knot* gene and demonstrate its direct regulation by the Hedgehog signaling pathway and the UBX Hox protein. We find that a minimal element for repression in the haltere is not conserved, but a second, apparently redundant, element is conserved, and is located more than 500 bp from the minimal region. This result suggests that UBX repression is distributed over a large regulatory region that may not have sharply bounded elements, as defined by sequence conservation. In addition, a second, novel UBX repression element appears to have evolved in the *D. melanogaster* lineage in the presence of a pre-existing functional element, suggesting that selection is acting on a larger region than the minimally defined regulatory module.

## Materials and methods

### *knot* reporter constructs

Initial constructs were generated by PCR amplification or restriction digest from *Drosophila melanogaster* genomic DNA P1 clone DS00158. DNA fragments located 5' of *knot* were cloned into the *hsp-lacZ-CaSpeR* reporter plasmid (Nelson and Laughon, 1993) and verified by sequence analysis. Reporter plasmids were injected to generate transgenic fly lines. Smaller fragments were generated either by restriction digest or PCR amplification, and subsequent cloning into the *lacZ* reporter vector. Cloning details are available upon request.  $\beta$ -Galactosidase activity for reporter constructs was detected with X-gal, and was assayed in a minimum of three independent transgenic lines.

### Immunohistochemistry

Third-instar imaginal discs were dissected, fixed and immunostained as previously described (Galant et al., 2002). Knot protein was

detected with rabbit anti-Kn antibody provided by Michèle Croizatier (Croizatier and Vincent, 1999). Engrailed protein was detected with mouse monoclonal antibody 4F11 provided by Nipam Patel (Patel et al., 1989).

### Mutagenesis of Ci- and UBX-binding sites

Ci-binding sites were altered by PCR mutagenesis. Site Ci1047 was altered from TGGGTGGCA to TGGGTAGGCA; site Ci1341 was altered from GCGGTGGTC to GCGGTAGTC; site Ci1680 was altered from TGTGTGGCC to TGTGTAGCC. UBX-binding sites were altered or deleted by PCR mutagenesis. UBX site 1 was altered from GCTTAATTTG to GCTGCGTTTG; UBX site 2 was altered from AGAATTAAGC to AGAAGCGCGC; UBX site 3 was altered from CCACTAATTA to CCACGCGCGC. The entire sequence of UBX site 4 shown in Fig. 4C was deleted by PCR sewing. The sequence of site 1835-1840 was altered from AACATGT to GGCCCTGT by PCR mutagenesis. UBX sites in aligned block 2 were altered using the Stratagene Quickchange Mutagenesis kit following the manufacturer's instructions.

### DNaseI footprinting

The fragment *kn*<sup>Mel1599-1991</sup> was amplified by PCR and cloned into pGEM-T-Easy (Promega). The plasmid was linearized with *SpeI*, labeled with [<sup>32</sup>P]-dNTPs by fill-in with Klenow enzyme, and precipitated overnight with ammonium acetate and ethanol. The insert was digested from the linearized plasmid with *EcoRI*, agarose gel purified and extracted from the gel using a Qiaquick PCR Cleanup column (Qiagen). UBX binding was performed by incubating ~40,000 cpm of labeled DNA with 3.3, 10, 30, 60 and 90 ng of purified UBX homeodomain (gift of Phil Beachy) in 1× DNaseI reaction buffer (40 mM Tris pH 8.0, 10 mM MgSO<sub>4</sub>, 1 mM CaCl<sub>2</sub>) for 30 minutes. For digestion, 5 µl DNaseI (1:40 dilution of Promega RQ1 DNaseI in DNase reaction buffer) was added, reactions were allowed to incubate for 2 minutes, and were stopped by addition of 140 µl 20 mM EGTA (pH 8.0). Reactions were extracted with phenol:chloroform, precipitated in ethanol, resuspended in formamide loading buffer and separated on an 8% polyacrylamide sequencing gel. G+A sequencing ladder was generated as previously described (Maxam and Gilbert, 1980).

### Amplification of *Drosophila* spp. *knot* regulatory sequences

Genomic DNA was isolated from additional species of *Drosophila* obtained from the Tucson *Drosophila* Stock Center: *D. mauritiana*, *D. malerkotliana*, *D. biarmipes*, *D. pseudoobscura* and *D. virilis*. Ten to fifteen flies suspended in homogenization buffer [10 mM Tris pH 7.8, 50 mM NaCl, 10 mM EDTA, 5% (w/v) sucrose] were crushed with a pestle. Lysis buffer (300 mM Tris pH 9.5, 100 mM EDTA, 0.625% SDS, 5% sucrose) and RnaseA (50 µg/ml final concentration) were added, and the homogenate was incubated at 70°C for 15 minutes. One-tenth volume sodium acetate was added and the mixture was incubated on ice 30 minutes. After pelleting debris, genomic DNA was extracted with phenol:chloroform, precipitated in ethanol and resuspended in TE. PCR amplification was performed with *PfuTurbo* polymerase: forward primer 5'-GTCACTTGATCGCT-GCATTG-3'; reverse primer 5'-GGATTTGCTTGGGAATTG-3'. Amplified fragments were A-tailed and cloned into pGEM-T-Easy for sequencing. Sequence alignments were generated using CLUSTALW (Thompson et al., 1994) and then adjusted by hand.

## Results

### Identification of a wing-specific *knot* regulatory element

The *knot* gene is expressed in the developing *Drosophila* wing imaginal disc at the anteroposterior compartment boundary, but

is not expressed in the haltere imaginal disc (Fig. 1). Furthermore, *knot* expression is genetically downstream of *Ubx*, as overexpression of *UBX* in clones in the wing causes cell-autonomous loss of *knot* expression (Fig. 1C) (Galant et al., 2002). Because these features make *knot* a candidate for direct regulation by *UBX*, we set out to identify the regulatory element that controls *knot* expression in the wing.

One regulatory element of *knot* had been previously identified that drives reporter gene expression in the embryonic head and mesoderm. This element extends ~5 kb from the transcriptional start site of *knot* (Crozatier and Vincent, 1999). When a *knot* cDNA was placed under control of this element, embryonic lethality was rescued, but wing vein defects were not (Vervoort et al., 1999), indicating that the wing regulatory element is located elsewhere. The lesion underlying the wing-specific *knot*<sup>SA2</sup> allele, which is a complex translocation with a breakpoint 10–20 kb 5' of the *knot*-coding region (Seecoomar et al., 2000), suggested the location of a wing-specific regulatory element.

Based on the location of the *knot*<sup>SA2</sup> lesion, we generated reporter constructs with genomic DNA from the region 5–20 kb 5' of *knot* (Fig. 2A). We identified a 6.8 kb region of DNA ~15 kb 5' of *knot* that drove expression of *lacZ* in a stripe at the

anteroposterior compartment boundary in the wing imaginal disc (data not shown), consistent with the expression pattern of the *Knot* protein. No expression of *lacZ* was observed in the haltere, demonstrating that this large region accurately recapitulates the expression and regulation of the endogenous *knot* gene. To determine if both wing and haltere regulation was confined to a single region within this 6.8 kb, we further narrowed the activity to a 2.3 kb region that drove appropriate reporter gene expression (data not shown). All subsequent numbering of constructs is in reference to this 2.3 kb region, *kn*<sup>Mel</sup>1–2330.

Sequence conservation has been successfully employed in

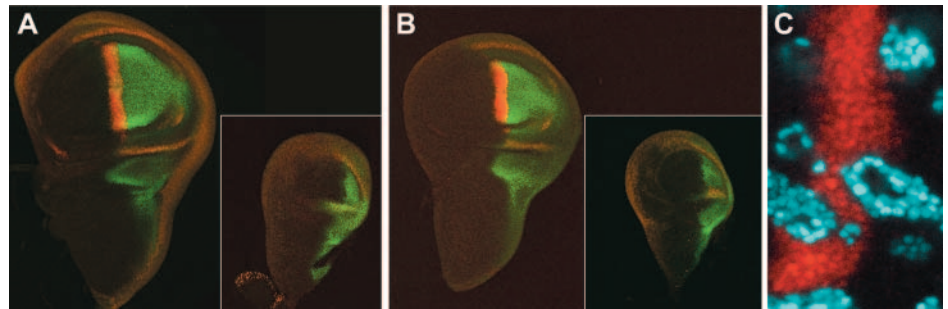

**Fig. 1.** The *knot* gene is a candidate *UBX*-regulated target gene. (A) *Knot* protein (red) is expressed at the anteroposterior compartment boundary in the developing wing of *Drosophila melanogaster*, but is absent from the haltere (inset). *Engrailed* protein (green) indicates the extent of the posterior compartment, which is smaller in the haltere than in the wing. (B) The distribution of *Knot* protein in *D. pseudoobscura* is identical to that in *D. melanogaster*. (C) In mitotic clones that overexpress *UBX* protein (blue), *Knot* is cell-autonomously repressed. (C) Courtesy of Ron Galant.

**Fig. 2.** Localization of a wing-specific regulatory element of *knot*.

(A) Genomic region upstream of the *knot* gene. The first exon of *knot* is shown in blue. Exons of neighboring genes are shown in gray. Regions 10–15 kb upstream of the transcription start site were tested for cis-regulatory activity. Regions directing expression in the wing are indicated in blue and regions lacking activity are indicated in black. (B) VISTA plot (Couronne et al., 2003) of *kn*<sup>Mel</sup>1–2330 fragment aligned with sequence from *D. pseudoobscura* and *D. virilis*. A window size of 50 bp was used, and regions that are greater than 70% identical are indicated in orange. Shown below are the constructs generated on the basis of the distribution of sequence conservation among *Drosophila*. (C) *lacZ* reporter expression in the wing imaginal disc under the control of the *kn*<sup>Mel</sup>701–1991 fragment. No expression is observed in the haltere imaginal disc (inset). (D) Wing imaginal disc of individual carrying *kn*<sup>Mel</sup>701–1991 fragment stained for *Knot* protein (red) and *lacZ* (green). The yellow stripe indicates complete overlap of the two patterns.

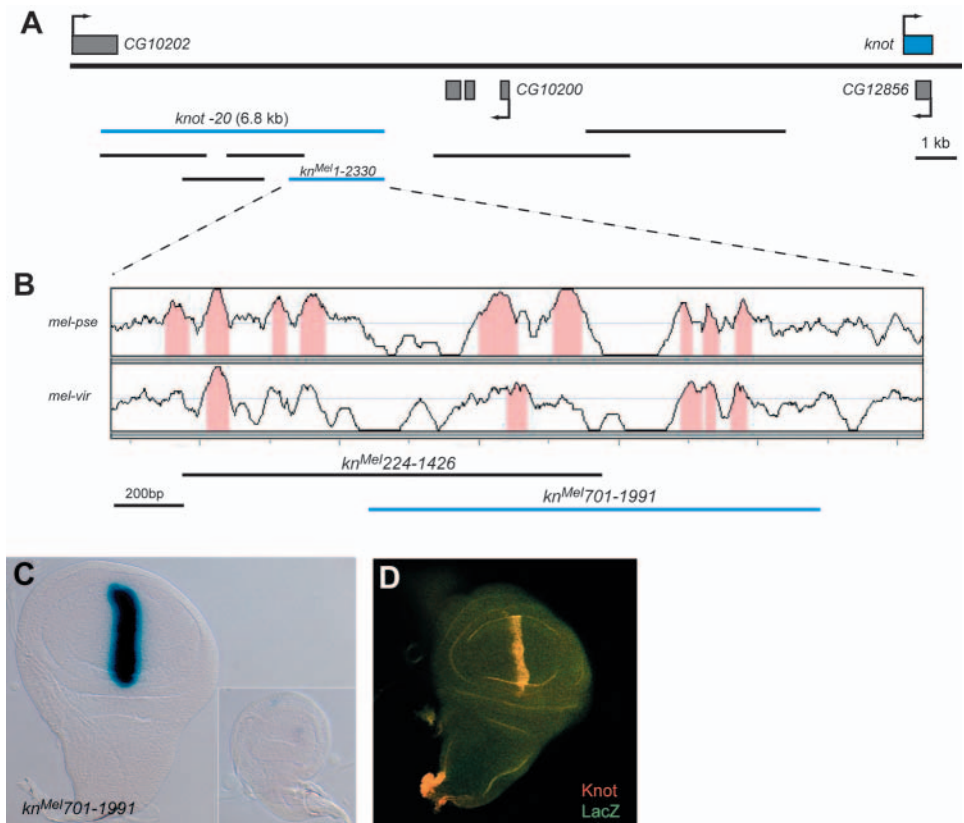



the identification of regulatory elements (Wasserman et al., 2000; Yuh et al., 2002). We attempted to use conservation to direct the further dissection of *kn<sup>Mel</sup>1-2330* to define a minimal regulatory element. Based on several scattered blocks of sequence conservation between *D. melanogaster* and *D. pseudoobscura*, we designed PCR primers to amplify sequence from a more distantly related fruit fly, *D. virilis*. Three conserved blocks were shared between these three flies, and we split *kn<sup>Mel</sup>1-2330* into two overlapping constructs (Fig. 2B), each containing two of the conserved blocks. Though both constructs included the central conserved block that contained several potential sites for regulators, only the 1.3 kb *kn<sup>Mel</sup>701-1991* construct was capable of driving expression in a stripe in the wing (Fig. 2C), whereas the *kn<sup>Mel</sup>224-1426* construct was only weakly expressed in a single small spot at the intersection of the DV and AP axes in the wing (data not shown). Therefore, the 1.3 kb region accurately recapitulates the *knot* expression pattern (Fig. 2D) in both the wing and haltere, and must contain binding sites for the regulators that generate this pattern.

### A single Ci binding site mediates activation in the wing

Expression of the *knot* gene is dependent on Hedgehog (Hh) activity, and overexpression of Hh can trigger ectopic *knot* expression in the wing (Vervoort et al., 1999). The transcriptional effector of Hh signaling is the Cubitus interruptus (Ci) protein. Ci is a zinc-finger transcription factor of the Gli family, and binds a 9 bp consensus sequence TGGG(T/A)GGTC (Von Ohlen et al., 1997). In the 1.3 kb *kn<sup>Mel</sup>701-1991* fragment, we identified three potential Ci-binding sites that matched at least seven out of nine consensus residues and that were conserved in *D. pseudoobscura* (Fig. 3A). Two additional potential sites were present, but were not conserved in *D. pseudoobscura*. We mutagenized the three conserved binding sites independently, converting a crucial guanine to an adenine (Zarkower and Hodgkin, 1993), and re-introduced the mutagenized element into flies. Changes at two of the three candidate sites had no effect on reporter gene expression (data not shown), whereas the mutation of site Ci1680 almost completely abolished reporter expression (Fig. 3B). Mutation of all three sites did not have a more severe effect than mutation of Ci1680 alone (data not shown). These

results indicate that activation of the wing-specific enhancer element by Hh signaling is dependent primarily on a single Ci-binding site at position 1680 in the *kn<sup>Mel</sup>701-1991* element.

### UBX repressor sites are physically separable from activator sites

Because the *kn<sup>Mel</sup>701-1991* element drives expression in the wing, but not the haltere, we postulated that this sequence integrates information from Hh signaling and the homeotic regulator, UBX. Therefore, we attempted to identify possible binding sites for UBX within this element. Isolated UBX homeodomain binds optimally in vitro to the sequence TTAATGG (Ekker et al., 1991), but binding sites in characterized UBX-responsive regulatory elements often are not exact matches to this optimal sequence (Capovilla et al., 1994; Galant et al., 2002; Vachon et al., 1992). Therefore, we searched for the TAAT core sequence commonly bound by homeodomain proteins. The *kn<sup>Mel</sup>701-1991* fragment contains clusters of TAAT core sequences near both its 5' and 3' limits (Fig. 4A) that might mediate *knot* repression in the haltere. In addition, there is a single TAAT core sequence located within 10 bp of the crucial Ci-binding site and in a conserved block of sequence, suggesting that it may be important for repression by UBX.

To determine which TAAT sequences might be functionally important for UBX repression, we removed sequences from each end of *kn<sup>Mel</sup>701-1991* and observed the effect on reporter gene expression in vivo. Removal of the 5' end, with its small cluster of four core sequences, had no effect on expression. By contrast, removal of 156 bp from the 3' end, including nine putative UBX-binding sites (*kn<sup>Mel</sup>701-1835*), caused the reporter to be expressed at the AP compartment boundary in both the wing and the haltere (Fig. 4B). Therefore, *kn<sup>Mel</sup>701-1991* does appear to be directly negatively regulated by UBX in the haltere, and removal of UBX-binding sites relieves repression in the haltere. In addition to the ectopic activation of expression in the haltere, we noted that the expression level in the wing is also elevated compared with *kn<sup>Mel</sup>701-1991* (Fig. 2C, Fig. 4B), suggesting that additional repressor binding sites important for appropriate wing expression may have been removed in *kn<sup>Mel</sup>701-1835*. Importantly, the response to local spatial information within the wing field (encompassing both

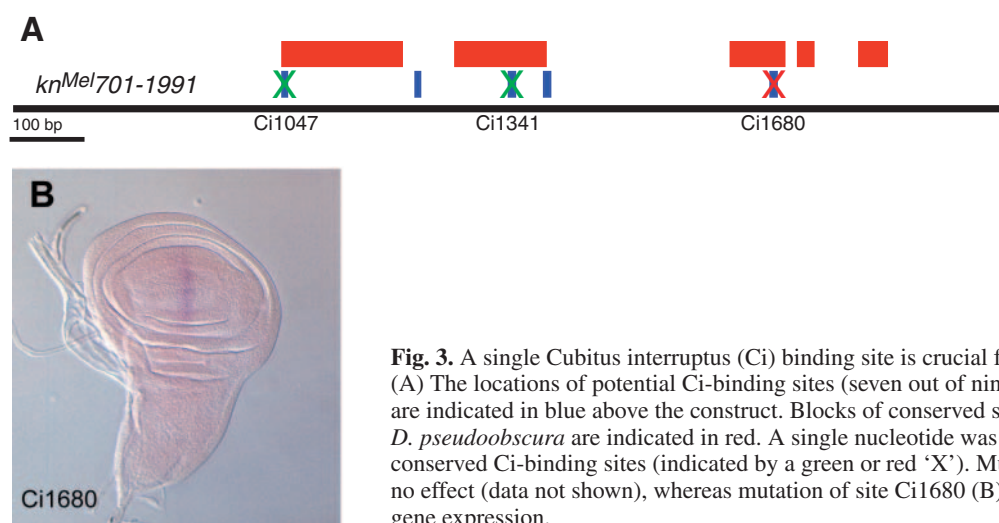

**Fig. 3.** A single Cubitus interruptus (Ci) binding site is crucial for activation of *knot* in the wing. (A) The locations of potential Ci-binding sites (seven out of nine residues or greater match consensus) are indicated in blue above the construct. Blocks of conserved sequence between *D. melanogaster* and *D. pseudoobscura* are indicated in red. A single nucleotide was altered individually in each of three conserved Ci-binding sites (indicated by a green or red 'X'). Mutation of Ci1047 and Ci1341 sites has no effect (data not shown), whereas mutation of site Ci1680 (B) almost completely eliminates reporter gene expression.

**Fig. 4.** UBX binds a cluster of sites important for repression of *knot* in the haltere. (A) *kn<sup>Mel701-1991</sup>* sequence as in Fig. 3A, with UBX TAAT core sequences now indicated in brown. Extent of the *kn<sup>Mel701-1835</sup>* construct, which eliminates a cluster of core UBX sites, is indicated in blue. UBX sites identified by DNaseI footprinting are numbered. (B) Reporter expression directed by *kn<sup>Mel701-1835</sup>* is observed in both the wing and the haltere. Because the posterior compartment of the haltere is smaller than the anterior compartment, expression of *knot* at the compartment boundary is shifted with respect to the center of the disc. (C,D) DNaseI footprinting of *kn<sup>Mel1599-1991</sup>* with purified UBX homeodomain. Lane 1, no UBX protein; lanes 2-6, 3.3-90.0 ng UBX protein; lane 7, G+A sequencing ladder. Four sites protected by UBX are observed. The sequence of UBX site 1 (C) and UBX sites 2-4 (D) are indicated next to the footprints; TAAT core sequences within the each footprint are highlighted.

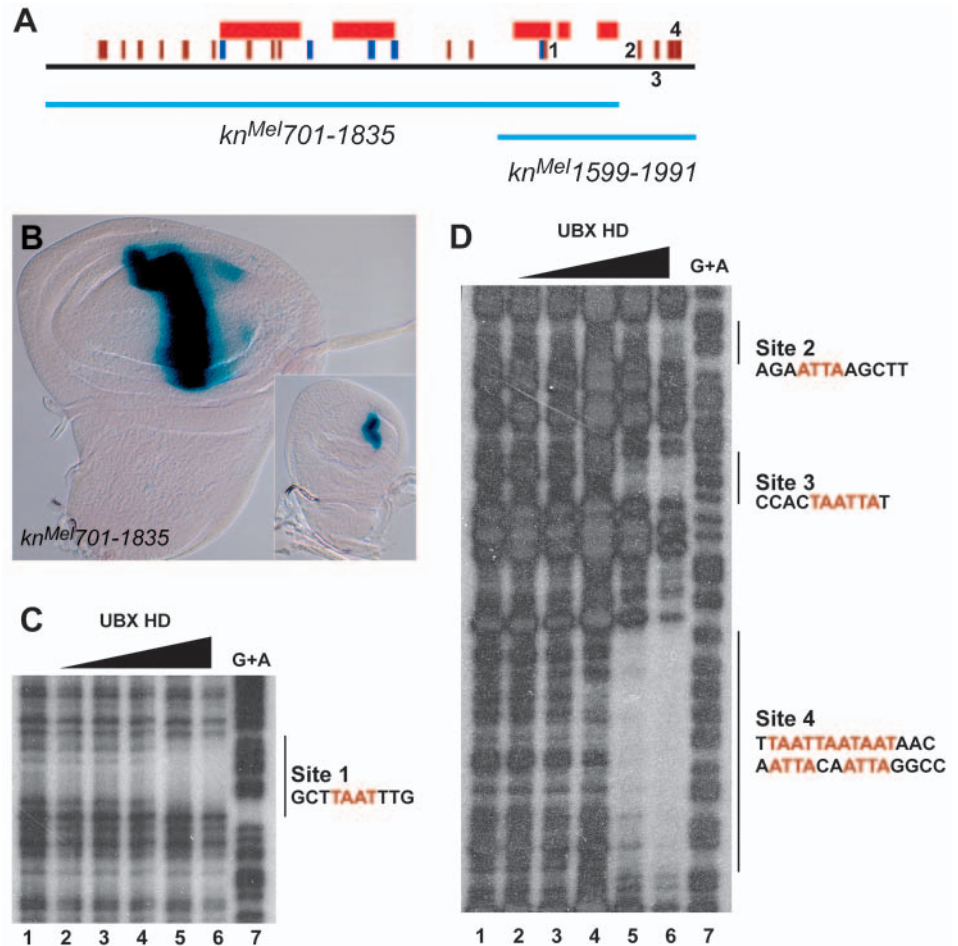

the wing and haltere) was maintained, as expression was appropriately observed at the AP compartment boundary in both tissues. Because the single deletion preserved the response to spatial information within the dorsal appendage wing field but altered the response to spatial information along the anteroposterior axis, we suggest that activation by Ci and repression by UBX are mediated through physically separable sites within *knot* cis-regulatory sequences.

To identify which potential binding sites could be occupied by UBX in vitro, we performed DNaseI footprinting on a 392 bp fragment (*kn<sup>Mel1599-1991</sup>*) that includes the functional Ci site and the 156 bp required for repression in the haltere. This fragment is itself capable of driving expression in the wing, although at a significantly lower level than that driven by the full *kn<sup>Mel701-1991</sup>*, and is repressed in the haltere (data not shown). We identified four regions protected from DNaseI digestion by binding of UBX (Fig. 4C,D, sites 1-4). These four regions include all TAAT core sequences present in the 392 bp fragment (10 in total).

Although UBX site 1 is located only 4 bp from the Ci-binding site, it is still present in the *kn<sup>Mel701-1835</sup>* construct that is derepressed in the haltere, so this site alone is not sufficient to mediate repression by UBX. To determine whether this site is necessary for repression by UBX, we mutated UBX site 1 alone (*kn<sup>Mel701-1991</sup>UBX1KO*) and did not observe any derepression of reporter gene expression in the haltere (Fig. 5A). Therefore, UBX Site 1, unlike individual UBX-binding sites in the *spalt* enhancer (Galant et al., 2002), does not appear to contribute significantly to repression of this element by UBX. Of the other regions protected by UBX, the largest spans six TAAT core sequences and ~24 bp of sequence, and is located ~250 bp from the Ci binding site. Therefore, the DNA

sequences necessary for repression in the haltere appears to be comprised of multiple, functional UBX-binding sites that do not overlap with the activating Ci-binding site. This organization suggests that UBX does not repress *knot* in the haltere by competing for activator binding sites.

#### Role of UBX binding sites and additional regulators

Individual UBX-binding sites can additively contribute to repression in the haltere of the *sal* wing-specific regulatory element (Galant et al., 2002). To determine how individual UBX binding sites in the *knot* element contribute to repression in the haltere, we independently mutated TAAT core sequences in UBX site 1 (Fig. 5A), UBX sites 2 and 3 (data not shown), and UBX site 4 (data not shown) in *kn<sup>Mel701-1991</sup>* and reintroduced these mutated constructs into flies. Elimination of these individual sites had no detectable effect on reporter gene expression in the haltere, so we proceeded to mutate all 10 TAAT core sequences in *kn<sup>Mel701-1991</sup>*, and introduced this construct (*kn<sup>Mel701-1991</sup>KO*) into flies. Elimination of all UBX sequences resulted in de-repression in the haltere (Fig. 5B), demonstrating that some combination of these sites is required for repression in vivo. However, we noted that the level of expression of this construct was lower than that observed in the deletion construct, *kn<sup>Mel701-1835</sup>* (Fig. 4B, Fig. 5B). This difference was not expected and suggested the presence of additional regulatory sequences that contribute to repression in the haltere.



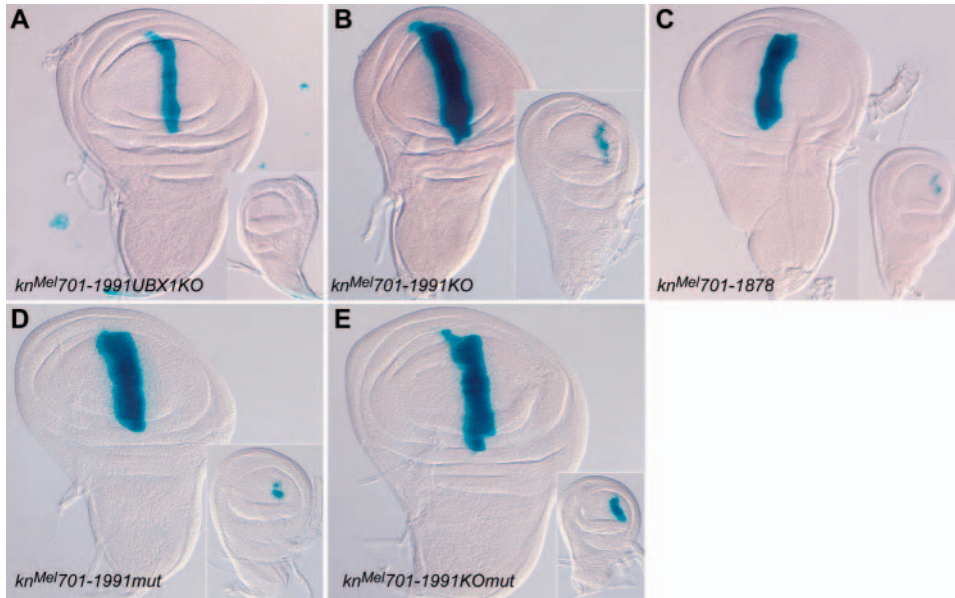

**Fig. 5.** UBX-binding sites and an additional site contribute to repression of *knot* in the haltere. (A) Mutation of UBX site 1 alone in *kn<sup>Mel</sup>701-1991* (*kn<sup>Mel</sup>701-1991UBX1KO*) does not cause any de-repression of reporter gene expression in the haltere. (B) Mutation of 10 UBX-binding sites in *kn<sup>Mel</sup>701-1991* (*kn<sup>Mel</sup>701-1991KO*) causes partial de-repression of reporter gene expression in the haltere. (C) *kn<sup>Mel</sup>701-1878*, which contains 43 nucleotides not present in *kn<sup>Mel</sup>701-1835* but no additional UBX-binding sites, directs weak reporter gene expression in the haltere, indicating that repression is partially independent of UBX. (D) Point mutation of *kn<sup>Mel</sup>1834-1837* (*kn<sup>Mel</sup>701-1991mut*) results in partial de-repression. (E) Mutation of both *kn<sup>Mel</sup>1834-1837* and the UBX-binding sites (*kn<sup>Mel</sup>701-1991KOMut*) results in full de-repression in the haltere.

To determine where additional potential regulatory sequences are located, we restored sequence 3' of the *kn<sup>Mel</sup>701-1835* construct. Addition of 43 bp (*kn<sup>Mel</sup>701-1878*) was sufficient to partially restore repression in the haltere (Fig. 5C), suggesting the additional regulatory information was contained within this region. Deletion of this block of sequence (*kn<sup>Mel</sup>701-1991Δ*) resulted in very weak, inconsistent de-repression in the haltere. By contrast, point mutations introduced at positions 1834-1837 (*kn<sup>Mel</sup>701-1991mut*), the boundary of the derepressed *kn<sup>Mel</sup>701-1835* construct, resulted in consistent, partial, de-repression (Fig. 5D). As this position is not a UBX site, this result suggests that at least one transcription factor acts in addition to UBX to repress *knot* in the haltere through this regulatory element. Mutation of both positions 1834-1837 and all UBX TAAT core sequences (*kn<sup>Mel</sup>701-1991KOMut*) resulted in full de-repression in the haltere (Fig. 5E), suggesting that UBX and another repressor act together to reduce expression in the haltere through sequences located between *kn<sup>Mel</sup>1835-1991*. The DNA sequence at *kn<sup>Mel</sup>1834-1837* does not clearly match any binding sites archived in transcription factor databases, and as yet we do not know the identity of the factor that may act with UBX to repress *knot* in the haltere.

#### Identification of a functional repressor element in *D. pseudoobscura*

To understand how UBX-regulated target gene networks evolve, it is crucial to determine how UBX regulation of individual target genes evolves. We combined our dissection of the *knot* wing regulatory element with comparative genomics within *Drosophila* to establish how UBX-responsive regulatory sequences in *knot* have evolved. We compared the 156 bp *knot* repressor element from *D. melanogaster* to *D. pseudoobscura* sequence, and did not observe either significant sequence conservation or a comparable cluster of potential UBX-binding sites in *D. pseudoobscura*. Because the expression pattern of *knot* is the same between these two species (Fig. 1), these significant sequence differences suggest that regulation by UBX is mediated through different

regulatory sequences in *D. pseudoobscura*. Therefore, we attempted to identify a functional regulatory element from *D. pseudoobscura* that could regulate reporter expression in the appropriate pattern.

Using blocks of sequence identity as relational anchor points, we amplified a fragment from *D. pseudoobscura* (*kn<sup>Pse</sup>1-1935*) that roughly corresponded to the *kn<sup>Mel</sup>1-2330* *D. melanogaster* fragment (Fig. 6A). We introduced this fragment into *D. melanogaster* and found that it could properly drive expression in the wing while repressing expression in the haltere (Fig. 7A). The *kn<sup>Pse</sup>1-1935* construct contained at its 3' end a cluster of 12 TAAT UBX core binding sites. To determine if this region is important for repression by UBX in *D. pseudoobscura*, we generated a truncation of *kn<sup>Pse</sup>1-1935* that eliminated the TAAT core sequences. This *kn<sup>Pse</sup>1-1643* construct appropriately drove expression in the wing, but now also drove haltere expression (Fig. 7B). Therefore, the region containing these putative UBX-binding sites acts as a repressor element in the haltere.

Interestingly, this functional cluster of UBX-binding sites is conserved between *D. pseudoobscura* and *D. melanogaster*, and is located ~500 bp 3' of the *kn<sup>Mel</sup>1835-1991* sequence necessary for repression, just 3' of the limit of the 6.8 kb fragment we originally isolated that contains the functional *D. melanogaster* *knot* regulatory element. Therefore, the *knot* regulatory region in *D. melanogaster* could potentially contain two sets of functional repressor input sites. To determine whether this second, conserved block can also function to repress the *D. melanogaster* *knot* regulatory element, we attached the *D. melanogaster* sequence to the de-repressed *kn<sup>Mel</sup>701-1835* construct. Addition of 222 nucleotides (*kn<sup>Mel</sup>2499-2722*), homologous to the *D. pseudoobscura* sequence necessary for repression, to *kn<sup>Mel</sup>701-1835* (to generate *kn<sup>Mel</sup>composite*) restored repression in the haltere (Fig. 7C). Therefore, *D. pseudoobscura* has a single element (located between *kn<sup>Pse</sup>1643-1935*) that represses expression of *knot* in the haltere, and this element is shared with *D. melanogaster*. However, *D. melanogaster* possesses a second element (located between *kn<sup>Mel</sup>1835-1991*), not shared with *D.*

*pseudoobscura*, that also functions to repress expression in the haltere (Fig. 7E).

We next sought to determine whether UBX-binding sites in the *kn<sup>Mel</sup>2499-2722* conserved element are sufficient to repress reporter expression, or whether this element also requires the action of a collaborating repressor. We mutated all UBX core binding sites in this sequence and attached the mutated *kn<sup>Mel</sup>2499-2722KO* sequence to the de-repressed *kn<sup>Mel</sup>701-1835* (generating *kn<sup>Mel</sup>compositeKO*). Whereas mutation of UBX sites alone in *kn<sup>Mel</sup>701-1991KO* did not fully de-repress

in the haltere, mutation of UBX sites in *kn<sup>Mel</sup>compositeKO* was sufficient for complete de-repression in the haltere (Fig. 7D). Thus, the *kn<sup>Mel</sup>2499-2722* and *kn<sup>Mel</sup>1835-1991* repressor elements appear to be organized differently – the former with input only from UBX, and the latter with input from UBX and an additional trans-acting factor.

Does the presence of two elements in *D. melanogaster* indicate the acquisition of a new element in this lineage or the loss of an element in *D. pseudoobscura*? To analyze the distribution of these two regulatory elements in other

**Fig. 6.** Functional UBX binding sites are not conserved within *Drosophila* (A) Schematic of a 1.9 kb fragment of *D. pseudoobscura* DNA, indicating the position of putative Ci-binding sites in blue and UBX TAAT core sequences in brown. This fragment (*kn<sup>Pse</sup>1-1935*) and a derivative that truncates ~300 nucleotides from the 3' end (*kn<sup>Pse</sup>1-1643*) were cloned from *D. pseudoobscura* and injected into *D. melanogaster*. (B) Alignment of *knot* enhancer sequences from five *Drosophila* species: *D. melanogaster*, *D. mauritiana*, *D. biarmipes*, *D. malerkotliana* and *D. pseudoobscura*. (Above) Aligned block 1, which contains the footprinted UBX binding sites (red), the functional Ci binding site (blue) and the mutated site at the boundary of the *kn<sup>Mel</sup>701-1835* construct (purple). (Below) Aligned block 2, with conserved TAAT sequences indicated in red. Arrows in aligned block 2 indicate the *kn<sup>Mel</sup>2499-2722* sequence added to *kn<sup>Mel</sup>701-1835* to generate the *kn<sup>Mel</sup>composite* construct.

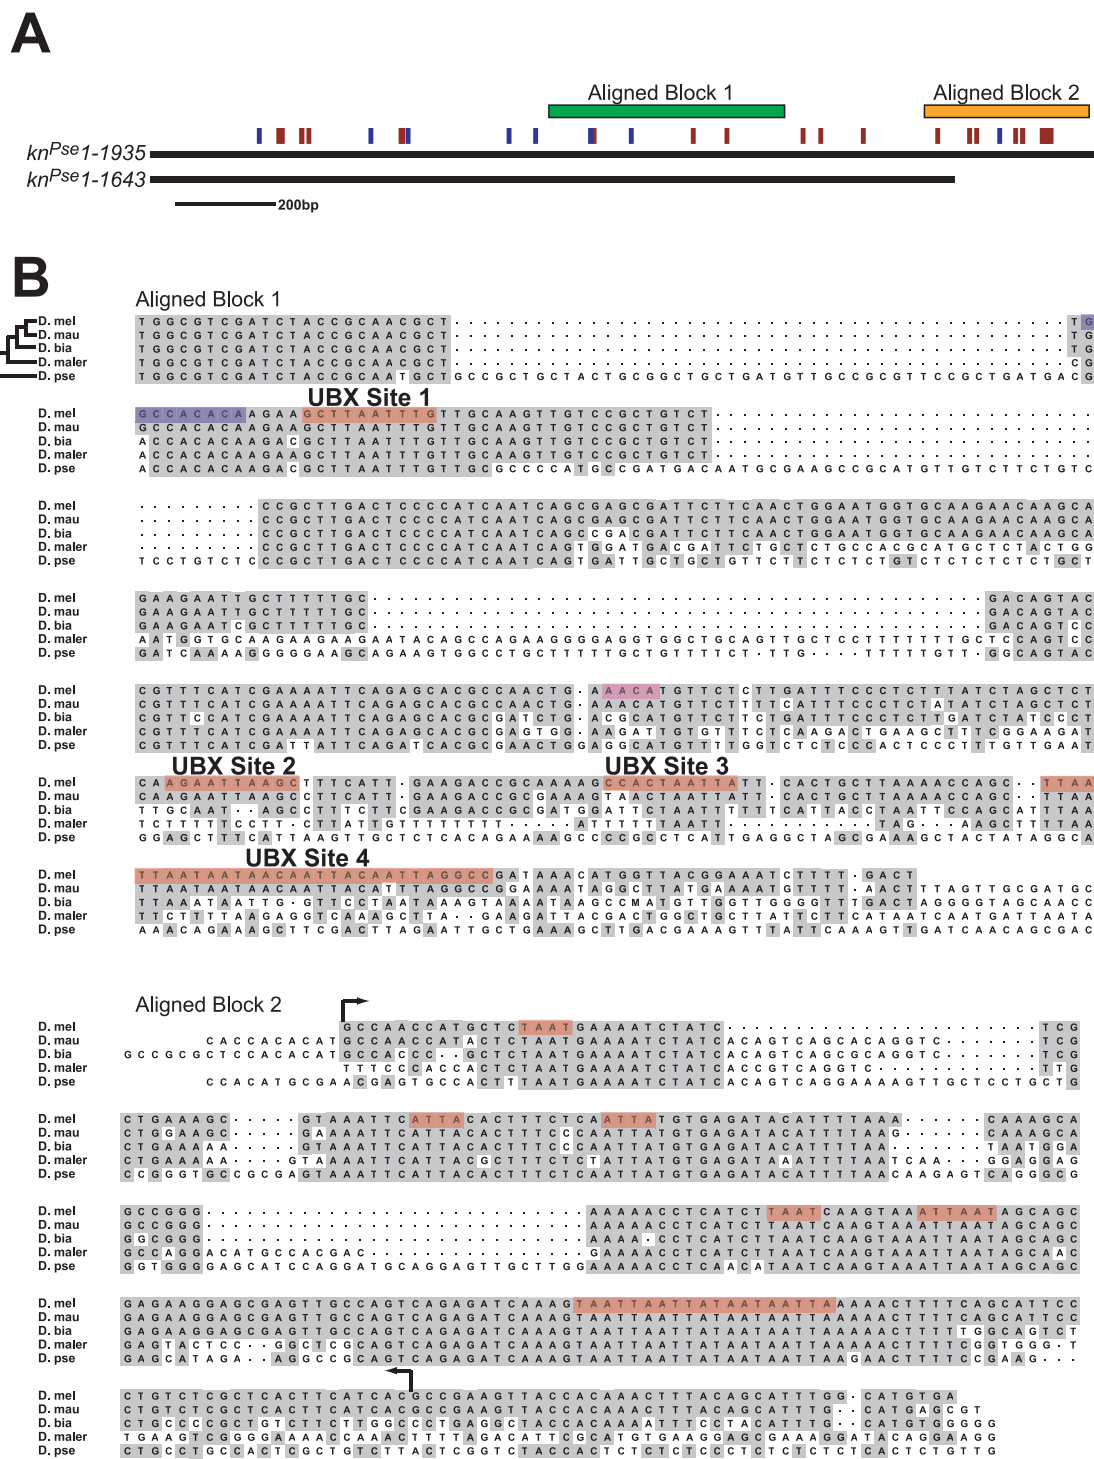



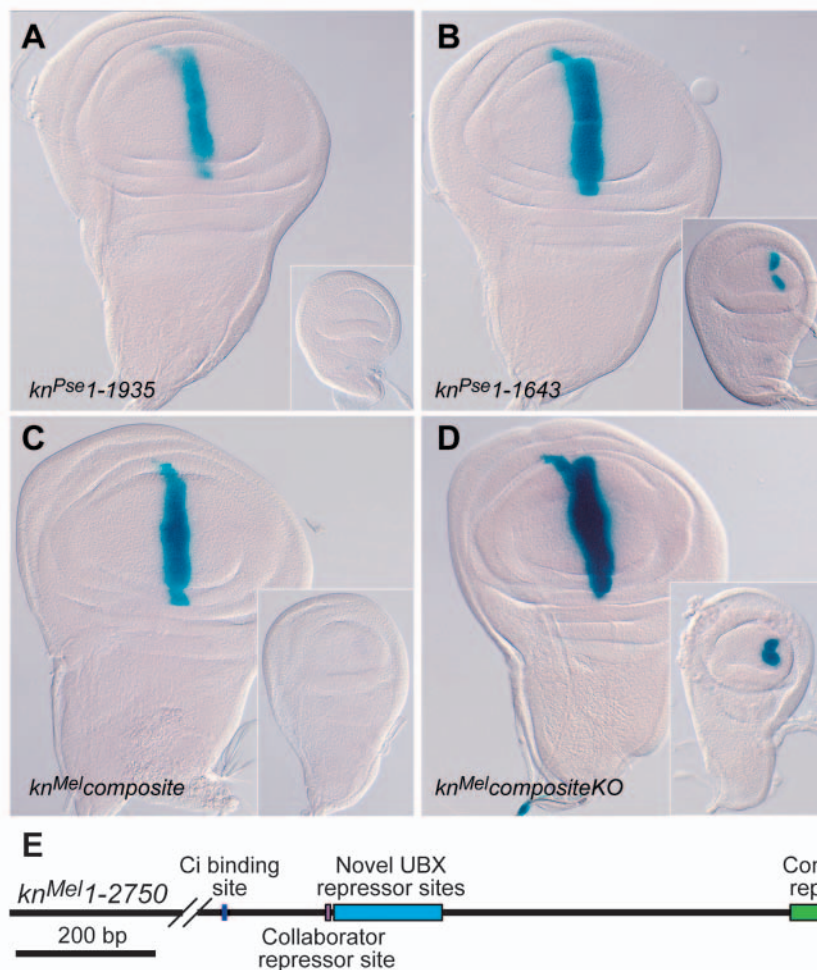

**Fig. 7.** *D. melanogaster* possesses a second UBX-responsive *knot* regulatory element that is conserved with *D. pseudoobscura*. (A) *kn<sup>Pse</sup>1-1935* is expressed in the wing, but not in the haltere. (B) *kn<sup>Pse</sup>1-1643*, which eliminates the conserved block of TAAT core sequences, is expressed in both the wing and the haltere. (C) Addition of 222 nucleotides (*kn<sup>Mel</sup>2499-2722*) of *D. melanogaster* sequence to the de-repressed *kn<sup>Mel</sup>701-1835* construct (to generate *kn<sup>Mel</sup>composite*) is sufficient to restore repression, indicating that this conserved region is a functional repressor sequence in both *D. melanogaster* and *D. pseudoobscura*. (D) Mutation of UBX sites alone in *kn<sup>Mel</sup>composite* (*kn<sup>Mel</sup>compositeKO*) is sufficient for full de-repression, suggesting that UBX does not require the function of a collaborator at this repressor element. (E) The *knot* wing regulatory region. The crucial Ci binding site is indicated in dark blue, the UBX repressor element novel to the *D. melanogaster* lineage is indicated in light blue, the conserved UBX repressor element is indicated in green and the collaborating repressor site is indicated in pink.

activation and repression are physically separable, and the repression element was found not to be shared with *D. pseudoobscura*. We identified a distinct functional repression element in *D. pseudoobscura* that is shared with *D. melanogaster*, indicating that the entire *knot* wing regulatory region in *D. melanogaster* contains two

apparently redundant repressor elements. One element appears to have been acquired in the course of the evolution of the *D. melanogaster* lineage. Our results suggest that complete functional cis-regulatory elements, the units of function that selection is operating upon, may be larger and more diffuse than the minimal functional sequences typically defined by molecular dissection.

### Mechanism of UBX repression

Owing to their low DNA-binding specificity and paucity of known direct targets, mechanisms for the selection of specific target genes by Hox proteins remain to be fully explained. Much work has focused on the role of co-factors in increasing the binding specificity of their Hox partners. When Hox proteins interact with PBC and MEIS proteins, represented in *Drosophila* by EXD and HTH (Chan et al., 1997; Gebelein et al., 2002; Ryoo and Mann, 1999; Ryoo et al., 1999), the resulting compound-binding sites are of sufficient size and information content so as not to appear by random chance at high frequency in the genome. However, neither EXD nor HTH are necessary for development of the haltere, so the action of UBX in this tissue must be independent of these co-factors (Azpiazu and Morata, 1998; Azpiazu and Morata, 2000). Repression of *spalt* gene expression by UBX in the haltere depends upon multiple individual UBX monomer-binding sites, (Galant et al., 2002) rather than compound binding sites.

drosophilids, we amplified the *knot* regulatory region from three additional *Drosophila* species – *D. mauritiana*, *D. biarmipes* and *D. malerkotliana* – phylogenetically intermediate between *D. melanogaster* and *D. pseudoobscura* (Schawaroch, 2002). All three species have sequence similar to *kn<sup>Pse</sup>1643-1935* (Fig. 6B), but also possess sequence similar to *kn<sup>Mel</sup>1835-1991* in varying degrees. For example, the core TAAT of UBX site 3 is shared by all three additional species (though sequence surrounding the core is non-identical), whereas UBX site 2 is found only in *D. mauritiana*. The most interesting pattern is observed for UBX site 4. *D. malerkotliana* has only a single core UBX sequence conserved with *D. melanogaster*, *D. biarmipes* has two conserved core sequences and two additional core sequences that are unique, and *D. mauritiana* has five of the six core sequences present in *D. melanogaster*. Therefore, in this sample of five drosophilid species, we observe the pattern of an apparent accretion of UBX-binding sites in this region in the evolution of the *D. melanogaster* lineage.

### Discussion

We have identified a wing-specific cis-regulatory element for the gene *knot*. This regulatory element is activated in the wing by direct input from Ci and is repressed in the haltere by direct input from UBX. The regulatory sequences governing



In addition, a DNA sequence that binds neither Hox proteins nor Hox-PBC dimers determines specificity of Deformed or Labial regulation of a Deformed autoregulatory element, but the identity of this co-factor is unknown (Li et al., 1999).

Our functional analysis of the *knot* regulatory element is consistent with UBX repression occurring through monomer sites. UBX-binding sites in the *sal1.1* and *knot* minimal enhancers cannot be aligned beyond the TAAT core, and so neither suggest the role of a common DNA binding co-factor. However, mutation of the identified UBX binding sites alone did not result in full de-repression of the *knot* minimal element in the haltere. Rather, full de-repression required mutation of additional sites not bound by UBX. This sequence may bind either a bona fide co-repressor that interacts with UBX to repress target genes or a protein that independently, but additively, contributes to repression. Because *kn<sup>Mel</sup>701-1835* drives a higher level of expression in the wing than *kn<sup>Mel</sup>701-1991*, this putative repressor may act in both the wing and the haltere.

Analyses of both the *sal* and *knot* regulatory regions suggest that UBX may be a weak repressor that requires the collaboration of other factors, which may act in the wing and haltere to regulate other features of these tissues, in order to mediate full repression. However, as mutation of UBX sites alone in *kn<sup>Mel</sup>2499-2722* is sufficient for de-repression, UBX may, in some contexts, be able to mediate full regulatory activity on its own. Flexibility in the organization of UBX-responsive enhancers may be due to the unsystematic, undesigned assembly of regulatory elements during evolution.

Regulatory elements that are cobbled together, incorporating binding sites for multiple collaborating transcription factors to take advantage of an existing landscape of developmental regulators, appear to be common. In the developing *Drosophila* embryo, both UBX and ABD-A repress the target gene *Distalless* (*Dll*) in abdominal segments, limiting leg development to the thoracic segments (Gebelein et al., 2002; Vachon et al., 1992). Repression of *Dll* also requires the action of the compartment-specific regulators, Engrailed and Sloppy-paired (Gebelein et al., 2004), in collaboration with the Hox proteins. In addition, the Hox protein Labial interacts with the Decapentaplegic (Dpp) signaling pathway to direct appropriate expression of the lab550 autoregulatory enhancer element in the *Drosophila* embryo (Marty et al., 2001), and Abdominal-A similarly collaborates with Dpp signaling to regulate *wingless* expression (Grienenberger et al., 2003). Collaboration may be a common requirement for Hox-regulated enhancers. Thus, rather than being highly potent regulators, Hox proteins may be weak regulators that employ a variety of collaborative factors in order to perform their function. The ability of Hox proteins to act as either repressors or activators of target genes may be regulated by interactions with different collaborators (Li and McGinnis, 1999; Li et al., 1999).

Furthermore, the weak activity of UBX and the potential requirement for collaborators for Hox repression of target genes may help to explain why it has not been possible to impart UBX regulation to a naïve cis-regulatory element by the addition of UBX monomer binding sites. Extensive efforts in this laboratory have placed multiple UBX-binding sites in various positions in cis-regulatory elements active in the wing and haltere, but with no effect (C. M. Walsh and S.B.C., unpublished). The separability of Ci activator binding sites

from UBX repressor binding sites in the *knot* regulatory element demonstrates that in this enhancer UBX does not repress by direct competition for activator binding sites, and suggests that distance of UBX-binding sites from activator binding sites is not the cause for this failure. If UBX is such a weak repressor that UBX-binding sites alone, even in multiple copies, are not sufficient to impart repression, then the proximity of binding sites for collaborating repressor proteins may be a crucial determinant.

### Conservation, redundancy, and the unit of selection in cis-regulatory elements

To better understand how UBX regulates morphology, we would ideally like to know all target genes on which it acts and the DNA regulatory sequences through which it exerts this control. Characterization of these regulatory sequences would elucidate the rules governing transcriptional regulation and how modification of regulatory sequences can occur during evolution. Our knowledge of the organizational constraints on regulatory sequences and how evolution operates within those constraints to maintain enhancer function is limited. Several analyses indicate that sequence within regulatory elements can vary even when function is maintained (Hancock et al., 1999; Ludwig et al., 1998; McGregor et al., 2001; Shaw et al., 2002). Nevertheless, sequence conservation between related organisms can successfully identify regulatory sequences in some lineages (Wasserman et al., 2000; Yuh et al., 2002). However, 98% of non-exonic multi-species conserved sequences within mammals do not correspond to known regulatory elements (Thomas et al., 2003). We can either suppose that these sequences primarily represent regulatory elements yet to be functionally characterized or that sequence conservation alone is not an indicator of regulatory function.

Our dissection of the *knot* regulatory region provides examples of apparently redundant binding sites for individual transcription factors, apparently redundant functional repressor elements, and sequence conservation without obvious biological function. For example, of three conserved putative Ci-binding sites, each contained within larger blocks of sequence conservation, only Ci1680 is necessary for activation of *knot* in the wing field. This observation suggests several possible interpretations. First, the other Ci sites may be functioning in a different context – a different tissue, for example – than examined in our assay, and selection has maintained these sites for that additional role. However, even the large 6.8 kb *knot* regulatory fragment did not appear to drive *lacZ* reporter expression in a limited set of additional tissues surveyed (data not shown), so we do not have any positive evidence supporting its role elsewhere in development. Similarly, the conserved blocks could represent binding sites for other factors, with conservation a consequence of maintaining those regulatory sites rather than the Ci sites. Next, it is possible that the evolutionary distance between *D. melanogaster* and *D. pseudoobscura* is not appropriate for addressing the relationship between sequence conservation and functional consequence. However, as this distance is approximately equivalent to the distance of the human-mouse comparison, we must then infer significant differences in the dynamics of sequence evolution within these two lineages. Finally, the additional Ci sites may contribute to regulation in the context of the wing to a degree that we are unable to detect,

but that purifying selection does act upon, and it is this view that we favor.

The apparent redundancy of UBX repressor elements in the *D. melanogaster knot* regulatory region also requires explanation. The accretion of UBX sites in the *knot* regulatory region in our sample of species phylogenetically intermediate to *D. pseudoobscura* and *D. melanogaster* suggests that a novel UBX-responsive element has evolved. Given the presence of a pre-existing, functional sequence that is maintained in both *D. melanogaster* and *D. pseudoobscura*, how has selection maintained the conserved element and allowed expansion of the novel element? Dissection of the *eve* stripe 2 regulatory element in both *D. melanogaster* and *D. pseudoobscura* demonstrated that compensatory evolution could lead to turnover of individual binding sites, resulting in a regulatory element with conserved function in the absence of sequence conservation (Ludwig et al., 1998; Ludwig et al., 2000). However, compensatory evolution that maintains repression of *knot* in the haltere does not seem to be the solution, as the downstream element is still present and therefore presumably capable of repressing *knot* expression. We conclude that the minimal element we identified in our functional assay is not necessarily identical to the functional unit upon which selection acts. That is, selection can detect and select for organismal-level effects of regulatory changes that are not obvious in our functional assay. Therefore, minimal functional regulatory elements defined by molecular dissection may not reflect the full, complete enhancers that selection has built. Rather than being sharply bounded and discrete, regulatory elements may be more diffuse collections of transcription factor inputs.

From an evolutionary standpoint, such a diffuse, flexible regulatory architecture seems a necessity. If particular precise arrangements of transcription factor binding sites are required to produce a transcriptional output, the probability of evolving a novel functional regulatory element by point mutation is exceptionally low. If, instead, a weak regulator, as UBX appears to be, collaborates with a factor already operating on an enhancer, then a novel output may be generated that may be reinforced by selection. This reinforcement may eventually result in a more precise, optimized arrangement of binding sites and a more robust regulatory output.

We thank J. Hooper for the GST-Ci plasmid; M. Crozatier, N. Patel and R. White for antibodies; P. Beachy for purified UBX homeodomain; R. Galant and C. Walsh for sharing unpublished results; J. Yoder and B. Williams for helpful comments on the manuscript; and K. Vaccaro for technical assistance. B.H. is supported by NIH NRSA F32GM65737 and S.B.C. is an Investigator of the Howard Hughes Medical Institute.

## References

- Azpiaz, N. and Morata, G. (1998). Functional and regulatory interactions between Hox and extradenticle genes. *Genes Dev.* **12**, 261-273.
- Azpiaz, N. and Morata, G. (2000). Function and regulation of homothorax in the wing imaginal disc of *Drosophila*. *Development* **127**, 2685-2693.
- Brodu, V., Elstob, P. R. and Gould, A. P. (2002). abdominal A specifies one cell type in *Drosophila* by regulating one principal target gene. *Development* **129**, 2957-2963.
- Capovilla, M., Brandt, M. and Botas, J. (1994). Direct regulation of decapentaplegic by Ultrabithorax and its role in *Drosophila* midgut morphogenesis. *Cell* **76**, 461-475.
- Chan, S. K., Ryoo, H. D., Gould, A., Krumlauf, R. and Mann, R. S. (1997). Switching the in vivo specificity of a minimal Hox-responsive element. *Development* **124**, 2007-2014.
- Couronne, O., Poliakov, A., Bray, N., Ishkhanov, T., Ryaboy, D., Rubin, E., Pachter, L. and Dubchak, I. (2003). Strategies and tools for whole-genome alignments. *Genome Res.* **13**, 73-80.
- Crozatier, M. and Vincent, A. (1999). Requirement for the *Drosophila* COE transcription factor Collier in formation of an embryonic muscle: transcriptional response to notch signalling. *Development* **126**, 1495-1504.
- Crozatier, M., Valle, D., Dubois, L., Ibensouda, S. and Vincent, A. (1999). Head versus trunk patterning in the *Drosophila* embryo; collier requirement for formation of the intercalary segment. *Development* **126**, 4385-4394.
- Crozatier, M., Ubeda, J. M., Vincent, A. and Meister, M. (2004). Cellular immune response to parasitization in *Drosophila* requires the EBF orthologue Collier. *PLoS Biol.* **2**, E196.
- Dolle, P., Dierich, A., LeMeur, M., Schimmang, T., Schuhbauer, B., Chambon, P. and Duboule, D. (1993). Disruption of the *Hoxd-13* gene induces localized heterochrony leading to mice with neonatal limbs. *Cell* **75**, 431-441.
- Ekker, S. C., Young, K. E., von Kessler, D. P. and Beachy, P. A. (1991). Optimal DNA sequence recognition by the Ultrabithorax homeodomain of *Drosophila*. *EMBO J.* **10**, 1179-1186.
- Galant, R., Walsh, C. M. and Carroll, S. B. (2002). Hox repression of a target gene: extradenticle-independent, additive action through multiple monomer binding sites. *Development* **129**, 3115-3126.
- Gebelein, B., Culi, J., Ryoo, H. D., Zhang, W. and Mann, R. S. (2002). Specificity of Distalless repression and limb primordia development by abdominal Hox proteins. *Dev. Cell* **3**, 487-498.
- Gebelein, B., McKay, D. J. and Mann, R. S. (2004). Direct integration of Hox and segmentation gene inputs during *Drosophila* development. *Nature* **431**, 653-659.
- Gellon, G. and McGinnis, W. (1998). Shaping animal body plans in development and evolution by modulation of Hox expression patterns. *BioEssays* **20**, 116-125.
- Grienerberger, A., Merabet, S., Manak, J., Iltis, I., Fabre, A., Berenger, H., Scott, M. P., Pradel, J. and Graba, Y. (2003). Tgf- $\beta$  signaling acts on a Hox response element to confer specificity and diversity to Hox protein function. *Development* **130**, 5445-5455.
- Hancock, J., Shaw, P., Bonneton, F. and Dover, G. (1999). High sequence turnover in the regulatory regions of the developmental gene hunchback in insects. *Mol. Biol. Evol.* **16**, 253-265.
- Knosp, W. M., Scott, V., Bachinger, H. P. and Stadler, H. S. (2004). HOXA13 regulates the expression of bone morphogenetic proteins 2 and 7 to control distal limb morphogenesis. *Development* **131**, 4581-4592.
- Li, X. and McGinnis, W. (1999). Activity regulation of Hox proteins, a mechanism for altering functional specificity in development and evolution. *Proc. Natl. Acad. Sci. USA* **96**, 6802-6807.
- Li, X., Veraksa, A. and McGinnis, W. (1999). A sequence motif distinct from Hox binding sites controls the specificity of a Hox response element. *Development* **126**, 5581-5589.
- Lohmann, I., McGinnis, N., Bodmer, M. and McGinnis, W. (2002). The *Drosophila* Hox gene deformed sculpts head morphology via direct regulation of the apoptosis activator reaper. *Cell* **110**, 457-466.
- Ludwig, M., Patel, N. and Kreitman, M. (1998). Functional analysis of eve stripe 2 enhancer evolution in *Drosophila*: rules governing conservation and change. *Development* **125**, 949-958.
- Ludwig, M. Z., Bergman, C., Patel, N. H. and Kreitman, M. (2000). Evidence for stabilizing selection in a eukaryotic enhancer element. *Nature* **403**, 564-567.
- Mann, R. S. and Carroll, S. B. (2002). Molecular mechanisms of selector gene function and evolution. *Curr. Opin. Genet. Dev.* **12**, 592-600.
- Marty, T., Vigano, M. A., Ribeiro, C., Nussbaumer, U., Grieder, N. C. and Affolter, M. (2001). A HOX complex, a repressor element and a 50 bp sequence confer regional specificity to a DPP-responsive enhancer. *Development* **128**, 2833-2845.
- Maxam, A. M. and Gilbert, W. (1980). Sequencing end-labeled DNA with base-specific chemical cleavages. *Methods Enzymol.* **65**, 499-560.
- McGregor, A. P., Shaw, P. J., Hancock, J. M., Bopp, D., Hediger, M., Wratten, N. S. and Dover, G. A. (2001). Rapid restructuring of bicoid-dependent hunchback promoters within and between Dipteran species: implications for molecular coevolution. *Evol. Dev.* **3**, 397-407.
- Mohler, J., Seecoomar, M., Agarwal, S., Bier, E. and Hsai, J. (2000). Activation of *knot* (kn) specifies the 3-4 intervein region in the *Drosophila* wing. *Development* **127**, 55-63.

- Nelson, H. B. and Laughon, A. (1993). Drosophila glial architecture and development – analysis using a collection of new cell-specific markers. *Roux's Arch. Dev. Biol.* **202**, 341-354.
- Patel, N. H., Martin-Blanco, E., Coleman, K. G., Poole, S. J., Ellis, M. C., Kornberg, T. B. and Goodman, C. S. (1989). Expression of engrailed proteins in arthropods, annelids, and chordates. *Cell* **58**, 955-968.
- Rozowski, M. and Akam, M. (2002). Hox gene control of segment-specific bristle patterns in Drosophila. *Genes Dev.* **16**, 1150-1162.
- Ryoo, H. D. and Mann, R. S. (1999). The control of trunk Hox specificity and activity by Extradenticle. *Genes Dev.* **13**, 1704-1716.
- Ryoo, H. D., Marty, T., Casares, F., Affolter, M. and Mann, R. S. (1999). Regulation of Hox target genes by a DNA bound Homothorax/Hox/Extradenticle complex. *Development* **126**, 5137-5148.
- Salser, S. and Kenyon, C. (1996). A C. elegans Hox gene switches on, off, on and off again to regulate proliferation, differentiation and morphogenesis. *Development* **122**, 1651-1661.
- Schawaroch, V. (2002). Phylogeny of a paradigm lineage: The Drosophila melanogaster species group (Diptera: Drosophilidae). *Biol. J. Linnean Soc.* **76**, 21-37.
- Seecoomar, M., Agarwal, S., Vani, K., Yang, G. and Mohler, J. (2000). knot is required for the hypopharyngeal lobe and its derivatives in the Drosophila embryo. *Mech. Dev.* **91**, 209-215.
- Shaw, P. J., Wratten, N. S., McGregor, A. P. and Dover, G. A. (2002). Coevolution in bicoid-dependent promoters and the inception of regulatory incompatibilities among species of higher Diptera. *Evol. Dev.* **4**, 265-277.
- Shemer, G. and Podbilewicz, B. (2002). LIN-39/Hox triggers cell division and represses EFF-1/fusogen-dependent vulval cell fusion. *Genes Dev.* **16**, 3136-3141.
- Thomas, J. W., Touchman, J. W., Blakesley, R. W., Bouffard, G. G., Beckstrom-Sternberg, S. M., Margulies, E. H., Blanchette, M., Siepel, A. C., Thomas, P. J., McDowell, J. C. et al. (2003). Comparative analyses of multi-species sequences from targeted genomic regions. *Nature* **424**, 788-793.
- Thompson, J. D., Higgins, D. G. and Gibson, T. J. (1994). CLUSTAL W: improving the sensitivity of progressive multiple sequence alignment through sequence weighting, position-specific gap penalties and weight matrix choice. *Nucleic Acids Res.* **22**, 4673-4680.
- Vachon, G., Cohen, B., Pfeifle, C., McGuffin, M. E., Botas, J. and Cohen, S. M. (1992). Homeotic genes of the Bithorax complex repress limb development in the abdomen of the Drosophila embryo through the target gene Distal-less. *Cell* **71**, 437-450.
- Vervoort, M., Crozatier, M., Valle, D. and Vincent, A. (1999). The COE transcription factor Collier is a mediator of short-range Hedgehog-induced patterning of the Drosophila wing. *Curr. Biol.* **9**, 632-639.
- Von Ohlen, T., Lessing, D., Nusse, R. and Hooper, J. E. (1997). Hedgehog signaling regulates transcription through cubitus interruptus, a sequence-specific DNA binding protein. *Proc. Natl. Acad. Sci. USA* **94**, 2404-2409.
- Wasserman, W. W., Palumbo, M., Thompson, W., Fickett, J. W. and Lawrence, C. E. (2000). Human-mouse genome comparisons to locate regulatory sites. *Nat. Genet.* **26**, 225-228.
- Weatherbee, S. D., Halder, G., Kim, J., Hudson, A. and Carroll, S. (1998). Ultrabithorax regulates genes at several levels of the wing-patterning hierarchy to shape the development of the Drosophila haltere. *Genes Dev.* **12**, 1474-1482.
- Weatherbee, S. D., Nijhout, H. F., Grunert, L. W., Halder, G., Galant, R., Selegue, J. and Carroll, S. (1999). Ultrabithorax function in butterfly wings and the evolution of insect wing patterns. *Curr. Biol.* **9**, 109-115.
- Yuh, C. H., Brown, C. T., Livi, C. B., Rowen, L., Clarke, P. J. and Davidson, E. H. (2002). Patchy interspecific sequence similarities efficiently identify positive cis-regulatory elements in the sea urchin. *Dev. Biol.* **246**, 148-161.
- Zarkower, D. and Hodgkin, J. (1993). Zinc fingers in sex determination: only one of the two C. elegans Tra-1 proteins binds DNA in vitro. *Nucleic Acids Res.* **21**, 3691-3698.
